# Supplementary material
Source: PubMed Central journal article supplement (PMC9904384)
Supplement: EIJ-D-21-01034_Alfonso_SD.pdf [file EIJ-D-21-01034_Alfonso_SD.pdf]

## Supplementary data

### Supplementary Appendix 1. Search strategy for systematic review.

#### PubMed

((Coronary[Title/Abstract]) AND (In-Stent[Title/Abstract])) AND (Restenosis[Title/Abstract])

#### Scopus

TITLE-ABS-KEY ( coronary ) AND TITLE-ABS-KEY ( in-stent ) AND TITLE-ABS-KEY ( restenosis ) AND ( LIMIT-TO ( DOCTYPE , "ar" ) OR LIMIT-TO ( DOCTYPE , "le" ) ) AND ( LIMIT-TO ( SUBJAREA , "MEDI" ) ) AND ( LIMIT-TO ( SRCTYPE , "j" ) OR LIMIT-TO ( SRCTYPE , "p" ) )

#### Web of Science

((TS=(Coronary)) OR TI=(Coronary)) OR AB=(Coronary)

((TS=(In-Stent)) OR TI=(In-Stent)) OR AB=(In-Stent)

((TS=(Restenosis)) OR TI=(Restenosis)) OR AB=(Restenosis)

#1 AND #2 AND #3

Document Type: Articles or Proceedings Paper or Meeting Abstracts

#### Ovid

(Coronary and In-Stent and Restenosis).ti,ab,kw.

1 and "Clinical Trial" [Publication Type]

1 and "Randomised Controlled Trial" [Publication Type]

1 and "Comparative Study" [Publication Type]

1 and "Clinical Study" [Publication Type]

1 and "Controlled Clinical Trial" [Publication Type]

2 or 3 or 4 or 5

**Supplementary Table 1.** Randomised Controlled Trials on the treatment of in-stent restenosis: Trial Characteristics

| Trial Characteristics       |      |       |         |     | Baseline Characteristics |        |             |          |          |
|-----------------------------|------|-------|---------|-----|--------------------------|--------|-------------|----------|----------|
| First Author/Trial (Ref. #) | Year | Stent | Therapy | n   | Age (years)              | DM (%) | Length (mm) | RVD (mm) | MLD (mm) |
| Teirstein et al. (95)       | 1997 | BMS   | IVBT    | 26  | 70                       | 27.0   | 12.9        | 2.88     | 1.10     |
|                             |      |       | BA/BMS  | 29  | 69                       | 41.0   | 11.9        | 2.78     | 1.03     |
| WRIST (150)                 | 2000 | BMS   | IVBT    | 65  | 63                       | 39.0   | 28.8        | 2.71     | 0.94     |
|                             |      |       | PCI     | 65  | 62                       | 45.0   | 26.7        | 2.72     | 0.81     |
| GAMMA-ONE (94)              | 2001 | BMS   | IVBT    | 131 | 58                       | 31.0   | 19.0        | 2.69     | 0.98     |
|                             |      |       | PCI     | 121 | 61                       | 31.0   | 20.3        | 2.73     | 0.96     |
| ARTIST (103)                | 2002 | BMS   | BA      | 146 | 61                       | 25.0   | 13.6        | 2.65     | 0.53     |
|                             |      |       | RA      | 152 | 62                       | 26.0   | 13.6        | 2.63     | 0.54     |
| RESCUT (88)                 | 2003 | BMS   | CB      | 214 | 62                       | 24.0   |             | 2.58     | 0.83     |
|                             |      |       | BA      | 214 | 61                       | 27.0   |             | 2.53     | 0.84     |
| RIBS I (115)                | 2003 | BMS   | BMS     | 224 | 61                       | 27.0   | 12.7        | 2.87     | 0.68     |
|                             |      |       | BA      | 226 | 61                       | 26.0   | 13.0        | 2.83     | 0.67     |
| Long WRIST (93)             | 2003 | BMS   | PCI     | 60  | 61                       | 37.0   | 29.1        | 2.55     | 0.70     |
|                             |      |       | IVBT    | 60  | 63                       | 42.0   | 29.2        | 2.57     | 0.80     |
| OSIRIS (125)                | 2004 | BMS   | BA      | 102 | 65                       | 27.5   |             | 2.61     |          |
|                             |      |       | SIR     | 99  | 65                       | 27.3   |             | 2.60     |          |
|                             |      |       | SIRhd   | 99  | 65                       | 32.2   |             | 2.57     |          |
| Ragosta et al. (151)        | 2004 | BMS   | BA      | 29  | 63                       | 21.0   | 5.1         | 3.02     | 0.79     |
|                             |      |       | BMS     | 29  | 64                       | 10.0   | 7.3         | 3.12     | 0.85     |
|                             |      |       | RA      | 30  | 59                       | 47.0   | 20.6        | 2.81     | 0.69     |

|                              |      |         |        |     |    |      |      |      |      |
|------------------------------|------|---------|--------|-----|----|------|------|------|------|
|                              |      |         | BMS    | 25  | 59 | 32.0 | 18.2 | 2.99 | 0.79 |
| <b>Montorsi et al. (152)</b> | 2004 | BMS     | BA     | 25  | 61 |      |      | 3.19 | 1.07 |
|                              |      |         | CB     | 25  | 66 |      |      | 3.28 | 0.93 |
| <b>ROSTER (104)</b>          | 2004 | BMS     | RA     | 100 | 63 | 31.0 | 18.6 | 2.85 | 0.82 |
|                              |      |         | BA/BMS | 100 | 65 | 30.0 | 16.7 | 2.82 | 0.92 |
| <b>Alfonso et al. (86)</b>   | 2005 | BMS     | BMS    | 20  | 66 | 40.0 | 12.8 | 2.55 | 0.91 |
|                              |      |         | BA     | 20  | 66 | 30.0 | 12.0 | 2.55 | 1.00 |
| <b>ISAR-DESIRE (42)</b>      | 2005 | BMS     | DES-S  | 100 | 63 | 31.0 | 12.4 | 2.60 | 0.91 |
|                              |      |         | DES-P  | 100 | 65 | 27.0 | 11.5 | 2.60 | 0.97 |
|                              |      |         | BA     | 100 | 64 | 25.0 | 12.3 | 2.57 | 0.95 |
| <b>PACCOCATH-ISR (153)</b>   | 2006 | BMS     | DCB    | 26  | 64 | 15.0 | 17.9 | 2.94 | 0.75 |
|                              |      |         | BA     | 26  | 64 | 15.0 | 18.1 | 2.95 | 0.67 |
| <b>RIBS II (57)</b>          | 2006 | BMS     | DES    | 76  | 64 | 38.0 | 16.9 | 2.66 | 0.74 |
|                              |      |         | BA     | 74  | 64 | 31.0 | 15.7 | 2.68 | 0.70 |
| <b>SISR (59)</b>             | 2006 | DES-BMS | DES    | 259 | 63 | 33.3 | 17.2 | 2.62 | 0.78 |
|                              |      |         | IVBT   | 125 | 64 | 29.6 | 16.8 | 2.64 | 0.86 |
| <b>TAXUS V ISR (60)</b>      | 2006 | BMS     | IVBT   | 201 | 63 | 30.3 | 15.0 | 2.61 | 0.83 |
|                              |      |         | DES-P  | 195 | 63 | 40.0 | 15.9 | 2.68 | 0.80 |
| <b>INDEED (61)</b>           | 2007 | BMS     | DES    | 65  | 61 | 30.8 | 27.5 | 2.77 | 0.78 |
|                              |      |         | IVBT   | 64  | 60 | 31.3 | 27.8 | 2.67 | 0.81 |
| <b>PEPCAD II (154)</b>       | 2009 | DES-BMS | DCB    | 66  | 65 | 33.3 | 15.7 | 2.85 | 0.74 |
|                              |      |         | DES    | 65  | 65 | 26.2 | 15.4 | 2.83 | 0.77 |
| <b>ISAR-DESIRE 2 (43)</b>    | 2010 | DES     | DES-P  | 225 | 67 | 38.8 | 12.5 | 2.75 | 0.95 |
|                              |      |         | DES-S  | 225 | 66 | 38.2 | 12.7 | 2.78 | 1.02 |
| <b>Habara et al. (66)</b>    | 2011 | DES     | DCB    | 25  | 70 | 56.0 | 12.7 | 2.69 | 0.99 |
|                              |      |         | BA     | 25  | 69 | 68.0 | 13.2 | 2.90 | 0.92 |

|                               |      |         |                                   |     |    |      |      |      |      |
|-------------------------------|------|---------|-----------------------------------|-----|----|------|------|------|------|
| <b>Wiemer et al. (155)</b>    | 2011 |         | DES                               | 44  | 65 | 49.0 | 25.2 | 2.89 | 0.70 |
|                               |      |         | IVBT                              | 47  | 64 | 49.0 | 17.2 | 2.77 | 0.85 |
| <b>PEPCAD- DES (69)</b>       | 2012 | DES     | DCB                               | 72  | 70 | 36.1 | 11.2 | 2.29 | 0.66 |
|                               |      |         | BA                                | 38  | 64 | 34.2 | 12.2 | 2.30 | 0.62 |
| <b>Song et al. (156)</b>      | 2012 | DES     | CB                                | 48  | 62 | 31.2 | 7.5  | 2.93 | 0.80 |
|                               |      |         | DES-S                             | 48  | 65 | 37.5 | 8.6  | 3.18 | 0.68 |
|                               |      |         | S-DES-d                           | 32  | 61 | 25.0 | 22.2 | 3.19 | 0.94 |
|                               |      |         | E-DES-d                           | 34  | 65 | 35.3 | 22.5 | 3.43 | 0.75 |
| <b>CRISTAL (58)</b>           | 2012 | DES     | DES-S                             | 136 | 68 | 39.0 | 14.6 | 2.60 | 1.09 |
|                               |      |         | BA                                | 61  | 67 | 38.0 | 13.4 | 2.50 | 1.58 |
| <b>ISAR-DESIRE 3 (44)</b>     | 2013 | DES     | DCB                               | 137 | 68 | 41.0 |      | 2.75 | 0.97 |
|                               |      |         | DES-P                             | 131 | 69 | 47.0 |      | 2.80 | 0.93 |
|                               |      |         | BA                                | 134 | 67 | 37.0 |      | 2.72 | 0.88 |
| <b>Habara et al. (70)</b>     | 2013 | DES/BMS | DCB                               | 137 | 68 | 46.0 | 12.8 | 2.52 | 0.86 |
|                               |      |         | BA                                | 71  | 70 | 42.0 | 13.7 | 2.49 | 0.84 |
| <b>RIBS V (157)</b>           | 2014 | BMS     | DCB                               | 95  | 67 | 32.0 | 13.7 | 2.64 | 1.02 |
|                               |      |         | DES-E                             | 94  | 64 | 20.0 | 13.8 | 2.64 | 0.93 |
| <b>PEPCAD-CHINA ISR (158)</b> | 2014 | DES     | DCB                               | 109 | 62 | 40.0 | 12.5 | 2.66 | 0.85 |
|                               |      |         | DES-P                             | 106 | 62 | 33.0 | 13.8 | 2.72 | 0.86 |
| <b>SEDUCE (159)</b>           | 2014 | BMS     | DCB                               | 25  | 68 | 24.0 |      | 3.00 | 0.98 |
|                               |      |         | DES-E                             | 25  | 64 | 4.0  |      | 2.85 | 0.57 |
| <b>RIBS IV (160)</b>          | 2015 | DES     | DCB                               | 154 | 66 | 49   | 10.4 | 2.59 | 0.79 |
|                               |      |         | DES-E                             | 155 | 66 | 43   | 10.7 | 2.67 | 0.75 |
| <b>PATENT-C (81)</b>          | 2015 | BMS     | Standard Scoring Balloon          | 28  | 64 | 35.7 | 13.8 | 2.54 | 0.73 |
|                               |      |         | Paclitaxel Coated Scoring Balloon | 33  | 65 | 42.4 | 16.5 | 2.72 | 0.90 |

|                               |      |         |                            |     |      |      |      |      |      |
|-------------------------------|------|---------|----------------------------|-----|------|------|------|------|------|
| <b>TIS (161)</b>              | 2016 | BMS     | DCB                        | 68  | 65.6 | 25.0 | 22.5 | 2.64 | 0.92 |
|                               |      |         | DES-E                      | 68  | 65.5 | 26.5 | 28.5 | 2.66 | 0.79 |
| <b>RESTENT- ISR (162)</b>     | 2016 | DES     | DES-E                      | 158 | 64.1 | 36.7 | 22.5 | 3.07 | 0.78 |
|                               |      |         | DES-Z                      | 146 | 62.2 | 36.3 | 24.7 | 3.15 | 0.89 |
| <b>ISAR-DESIRE 4 (80)</b>     | 2017 | DES     | Scoring Balloon pre DCB    | 125 | 69.4 | 40.8 |      | 2.96 | 1.01 |
|                               |      |         | Standard Treatment pre DCB | 127 | 69.4 | 43.3 |      | 2.89 | 0.94 |
| <b>DARE (163)</b>             | 2017 | DES-BMS | DCB                        | 137 | 66   | 42   |      | 2.56 | 0.77 |
|                               |      |         | DES-E                      | 141 | 65   | 46   |      | 2.59 | 0.79 |
| <b>RESTORE (164)</b>          | 2017 | DES     | DCB                        | 86  | 67   | 50.0 | 18.1 | 2.85 | 0.63 |
|                               |      |         | DES-E                      | 86  | 66   | 44.2 | 17.4 | 3.06 | 0.63 |
| <b>BIOLUX-RCT (165)</b>       | 2018 | DES-BMS | DCB                        | 157 | 67.2 | 30.6 | 5.8  | 3.0  | 1.0  |
|                               |      |         | DES                        | 72  | 69.4 | 33.3 | 7.2  | 2.9  | 0.9  |
| <b>RESTORE ISR CHINA (67)</b> | 2018 | DES     | RESTORE DCB                | 120 | 63.6 | 38.3 | 16.5 | 2.79 | 0.91 |
|                               |      |         | SEQUENT PLEASE DCB         | 120 | 63.9 | 38.3 | 16.2 | 2.71 | 0.90 |
| <b>Ali et al. (79)</b>        | 2019 | DES     | PACLITAXEL DCB             | 25  | 58.6 | 76   | 13.3 | 2.42 | 0.80 |
|                               |      |         | SIROLIMUS DCB              | 25  | 61.6 | 72   | 14.2 | 2.53 | 0.81 |
| <b>ELEGANT (91)</b>           | 2019 | DES-BMS | NON-SLIP BALLOON PRE DCB   | 105 | 70.0 | 51.4 | 13.8 | 2.56 | 0.93 |
|                               |      |         | HPNCB PRE DCB              | 105 | 68.9 | 47.6 | 13.3 | 2.54 | 0.91 |
| <b>Sato et al. (102)</b>      | 2019 | DES-BMS | ELCA + DCB                 | 20  | 69.0 | 50.0 | 13.9 | 2.75 | 0.67 |
|                               |      |         | DCB                        | 20  | 69.1 | 75.0 | 15.5 | 2.83 | 1.00 |

|                       |      |         |             |    |    |      |      |      |      |
|-----------------------|------|---------|-------------|----|----|------|------|------|------|
| <b>AGENT ISR (68)</b> | 2019 | DES-BMS | Agent DCB   | 65 | 68 | 36.9 | 11.7 | 2.60 | 0.75 |
|                       |      |         | SeQuent DCB | 60 | 69 | 36.7 | 13.3 | 2.48 | 0.65 |

**Supplementary Table 2.** Randomised Controlled Trials on the treatment of in-stent restenosis: Angiographic and Clinical Endpoints

| Trial Characteristics       |      |         |               | Angiographic Endpoints |            |            |          |        |               | Clinical Endpoints |           |        |         |         |
|-----------------------------|------|---------|---------------|------------------------|------------|------------|----------|--------|---------------|--------------------|-----------|--------|---------|---------|
| First Author/Trial (Ref. #) | Year | Therapy | Time (months) | RE (%)                 | ISTLL (mm) | ISGLL (mm) | MLD (mm) | DS (%) | Time (months) | MACE (%)           | Death (%) | MI (%) | TLR (%) | TVR (%) |
| Teirstein et al. (95)       | 1997 | IVBT    | 6             | 17*                    | 0.38*      |            | 2.43*    | 17.0*  | 12            | 15.0*              | 0.0       | 4.0    | 12.0*   |         |
|                             |      | BA/BMS  |               | 54                     | 1.03       |            | 1.85     | 37.0   |               | 48.0               | 3.0       | 0.0    | 45.0    |         |
| WRIST (150)                 | 2000 | IVBT    | 6             | 22*                    | 0.22*      |            | 2.03*    | 30.0*  | 12            | 35.3*              | 6.2       | 9.2    | 23.0*   | 33.8*   |
|                             |      | PCI     |               | 60                     | 1.00       |            | 1.24     | 57.0   |               | 67.3               | 6.2       | 9.2    | 63.1    | 67.6    |
| GAMMA-ONE (94)              | 2001 | IVBT    | 6             | 32*                    | 0.73*      |            | 1.78*    | 46.0*  | 9             | 28.2*              | 3.1       | 9.9    | 24.4*   | 31.3*   |
|                             |      | PCI     |               | 55                     | 1.14       |            | 1.37     | 53.0   |               | 43.8               | 0.8       | 4.1    | 42.1    | 46.3    |
| ARTIST (103)                | 2002 | BA      | 6             | 51*                    | 0.67*      |            | 1.20*    | 56.0*  | 6             | 20.4               |           |        | 31.0    |         |
|                             |      | RA      |               | 64                     | 0.91       |            | 0.99     | 63.0   |               | 9.9*               |           |        | 39.0    |         |
| RESCUT (88)                 | 2003 | CB      | 7             | 30                     | 0.56       |            | 1.61     | 39.0   | 7             | 16.4               | 1.4       | 1.4    | 13.5    |         |
|                             |      | BA      |               | 31                     | 0.62       |            | 1.55     | 40.0   |               | 15.4               | 0.9       | 1.4    | 13.1    |         |
| RIBS I (115)                | 2003 | BMS     | 6             | 38                     | 1.12       | 1.06       | 1.63     | 45.0   | 12            | 23.0               | 4.0       | 2.2    |         | 19.6    |
|                             |      | BA      |               | 39                     | 0.73*      | 0.72       | 1.52     | 46.0   |               | 29.0               | 3.0       | 5.3    |         | 24.3    |
| Long WRIST (93)             | 2003 | PCI     | 4-8           | 73                     | 0.99       | 0.85       | 0.93     | 65.0   | 12            | 63.3               | 1.7       | 18.3   | 61.7    |         |
|                             |      | IVBT    |               | 45*                    | 0.67*      | 0.65*      | 1.23     | 54.0*  |               | 42.2*              | 6.8       | 23.7   | 39.0*   |         |
| OSIRIS (125)                | 2004 | BA      | 6             | 42                     | 0.60       |            | 1.53     | 43.7   | 12            | 27.5               | 0.0       | 1.0    |         | 25.5    |
|                             |      | SIR     |               | 39                     | 0.72       |            | 1.37     | 45.8   |               | 29.3               | 3.0       | 0.0    |         | 24.2    |
|                             |      | SIRhd   |               | 22*                    | 0.49*      |            | 1.66*    | 38.1   |               | 18.2               | 2.0       | 0.0    |         | 15.2    |
| Ragosta et al. (151)        | 2004 | BA      |               |                        |            |            |          |        | 9             | 21.0               | 0.0       | 7.2    |         | 17.0    |
|                             |      | BMS     |               |                        |            |            |          | 7.0    |               | 3.6                | 3.6       |        | 3.6     |         |
|                             |      | RA      |               |                        |            |            |          | 43.0   |               | 6.6                | 3.3       |        | 40.0    |         |
|                             |      | BMS     |               |                        |            |            |          | 32.0   |               | 0.0                | 4.0       |        | 32.0    |         |
| Montorsi et al. (152)       | 2004 | BA      |               |                        |            |            |          |        | 6             | 28.0               | 0.0       |        | 40.0    |         |
|                             |      | CB      |               |                        |            |            |          | 17.0   |               | 0.0                |           | 12.5*  |         |         |
| ROSTER (104)                | 2004 | RA      | 9             | 42                     |            |            |          |        | 12            | 38.0*              | 2.0       | 3.0    | 32.0    |         |
|                             |      | BA/BMS  |               | 56                     |            |            |          |        |               | 52.0               | 2.0       | 3.0    | 45.0    |         |
|                             | 2005 | BMS     |               |                        |            |            |          |        | 23            | 25.0               | 5.0       | 0.0    |         | 20.0    |

|                            |      |         |     |       |       |       |       |       |    |       |      |      |       |        |
|----------------------------|------|---------|-----|-------|-------|-------|-------|-------|----|-------|------|------|-------|--------|
| <b>Alfonso et al. (86)</b> |      | BA      |     |       |       |       |       |       |    | 50.0  | 15.0 | 10.0 |       | 35.0   |
| <b>ISAR-DESIRE (42)</b>    | 2005 | DES-S   | 6-8 | 14*   | 0.10  | 0.30  | 2.12  | 23.1  | 12 | 11.0  | 2.0  | 1.0  |       | 8.0    |
|                            |      | DES-P   |     | 22*   | 0.26  | 0.55  | 2.02  | 26.6  |    | 22.0  | 1.0  | 2.0  |       | 19.0   |
|                            |      | BA      |     | 45    |       |       | 1.40  | 45.8  |    | 36.0  | 3.0  | 0.0  |       | 33.0   |
| <b>PACCOCATH-ISR (153)</b> | 2006 | DCB     | 6   | 5*    | 0.09* | 0.03* | 2.31  |       | 12 | 4.0*  | 4.0  | 4.0  | 0.0*  |        |
|                            |      | BA      |     | 43    | 0.76  | 0.74  | 1.60  |       |    | 31.0  | 0.0  | 8.0  | 23.0  |        |
| <b>RIBS II (57)</b>        | 2006 | DES     | 9   | 11*   |       | 0.13  | 2.52  | 8.0   | 12 | 11.8* | 3.9  | 2.6  |       | 10.5*  |
|                            |      | BA      |     | 39    |       | 0.69  | 1.54  | 40.0  |    | 31.1  | 4.1  | 2.7  |       | 29.7   |
| <b>SISR (59)</b>           | 2006 | DES     | 6   | 20    | 0.33  | 0.23  | 1.80  | 32.35 | 9  | 10.0* | 0.0  | 0.4  | 8.5*  | 10.8*  |
|                            |      | IVBT    |     | 30    | 0.27  | 0.33  | 1.52  | 40.97 |    | 19.2  | 0.0  | 0.0  | 19.2  | 21.6   |
| <b>TAXUS V ISR (60)</b>    | 2006 | IVBT    | 9   | 31    |       | 0.27  | 1.55  | 31.2  | 9  | 20.1  | 0.5  | 4.6  | 20.1  | 23.7   |
|                            |      | DES-P   |     | 15*   | 0.25  | 0.11* | 1.99  | 14.5  |    | 11.5* | 0.0  | 3.7  | 7.9 * | 12.0 * |
| <b>INDEED (61)</b>         | 2007 | DES     | 6   | 6*    | 0.15* | 0.23  | 2.29  | 20.42 | 12 | 7.7   | 3.1  | 1.5  | 4.6*  |        |
|                            |      | IVBT    |     | 21    | 0.55  | 0.40  | 1.76  | 32.61 |    | 18.8  | 0.0  | 0.0  | 18.8  |        |
| <b>PEPCAD II (154)</b>     | 2009 | DCB     | 6   | 4.0   | 0.19* | 0.17* | 2.08  | 29.4  | 12 | 7.6   | 1.5  | 0.0  | 6.3   |        |
|                            |      | DES     |     | 12.0  | 0.45  | 0.38  | 2.11  | 34.2  |    | 16.9  | 0.0  | 1.5  | 15.4  |        |
| <b>ISAR-DESIRE 2 (43)</b>  | 2010 | DES-P   | 6-8 | 21.0  | 0.38  | 0.25  | 2.16  | 25.4  | 12 | 19.6  | 4.5  | 1.8  | 13.8  |        |
|                            |      | DES-S   |     | 19.0  | 0.40  | 0.26  | 2.14  | 26.6  |    | 20.4  | 3.4  | 2.7  | 14.3  |        |
| <b>Habara et al. (66)</b>  | 2011 | DCB     | 6   | 9.0*  | 0.18* | 0.17* | 1.82  | 34.2  | 6  | 4.3*  | 0.0  | 0.0  | 4.3*  |        |
|                            |      | BA      |     | 63.0  | 0.72  | 0.72  | 1.28  | 58.0  |    | 41.7  | 0.0  | 0.0  | 41.7  |        |
| <b>Wiemer et al. (155)</b> | 2011 | DES     | 6   | 4.0*  | 0.09* |       | 2.66  | 7.78  | 12 | 4.0   | 2.0  | 0.0  | 2.0   | 2.0    |
|                            |      | IVBT    |     | 23.0  | 0.39  |       | 1.75  | 36.9  |    | 27.0  | 2.0  | 6.0  | 16.0  | 19.0   |
| <b>PEPCAD- DES (69)</b>    | 2012 | DCB     | 6   | 17.0  | 0.43  | 0.32  | 1.75  | 29.6  | 6  | 16.7* | 1.4  | 0.0  | 15.3* |        |
|                            |      | BA      |     | 58.0  | 1.03  | 0.99  | 1.10  | 51.1  |    | 50.0  | 10.5 | 2.6  | 36.8  |        |
| <b>Song et al. (156)</b>   | 2012 | CB      | 9   | 21.0  | 0.30  | 0.25  | 2.08  | 16.5  | 12 | 6.3   | 0.0  | 0.0  | 6.3   | 6.3    |
|                            |      | DES-S   |     | 3.0   | 0.02  | 0.06* | 2.57  | 12.5  |    | 6.3   | 0.0  | 6.3  | 0.0   | 0.0    |
|                            |      | S-DES-d |     | 5.0   | 0.13  | 0.13  | 2.58  | 25    |    | 9.6   | 3.1  | 3.1  | 3.1   | 3.1    |
|                            |      | E-DES-d |     | 14.0  | 0.07* | 0.07  | 2.71  | 18    |    | 8.8   | 2.9  | 2.9  | 5.8   | 5.8    |
| <b>CRISTAL (58)</b>        | 2012 | DES-S   | 12  | 11.0  | 0.37  |       | 2.14* | 21.0* | 12 |       | 2.2  | 2.9  | 5.9   | 2.2    |
|                            |      | BA      |     | 14.0  | 0.41  |       | 1.71  | 29.8  |    |       | 1.6  | 1.6  | 13.1  | 0.0    |
|                            | 2013 | DCB     | 6-8 | 27.0* | 0.37  |       | 1.79  | 38    |    | 23.5  | 2.2  | 2.1  | 22.1  | 24.2   |



|                               |      |                                   |     |       |       |              |              |             |    |      |               |      |      |      |
|-------------------------------|------|-----------------------------------|-----|-------|-------|--------------|--------------|-------------|----|------|---------------|------|------|------|
| <b>ISAR-DESIRE 3 (44)</b>     |      | DES-P                             |     | 24.0* | 0.34  |              | 1.82         | 37.4        |    | 19.3 | 4.6           | 2.4  | 13.5 | 16.6 |
|                               |      | BA                                |     | 57.0  | 0.70  |              | 1.26         | 54.1        |    | 46.2 | 5.3           | 1.5  | 43.5 | 45.1 |
| <b>Habara et al. (70)</b>     | 2013 | DCB                               | 6   | 4.3*  | 0.11* | 0.18*        | 1.87*        | 28.1*       | 6  | 6.6* | 0.0           | 0.0  | 2.9* | 6.6* |
|                               |      | BA                                |     | 31.9  | 0.49  | 0.72         | 1.42         | 44.1        |    | 31.0 | 0.0           | 0.0  | 31.0 | 31.0 |
| <b>RIBS V (157)</b>           | 2014 | DCB                               | 6   | 9.5   |       | 0.14         | 2.03         | 24          | 12 | 8.0  | 4.0           | 3.0  | 6.0  | 6.0  |
|                               |      | DES-E                             |     | 4.7   |       | 0.04         | 2.44*        | 13*         |    | 6.0  | 0.0           | 4.0  | 1.0  | 2.0  |
| <b>PEPCAD-CHINA ISR (158)</b> | 2014 | DCB                               | 9   | 18.6  | 0.54  | 0.46         | 1.80         | 29          | 12 | 16.5 | 0.0           | 3.7  | 14.7 | 16.5 |
|                               |      | DES-P                             |     | 23.8  | 0.62  | 0.55         | 1.76         | 31          |    | 16.0 | 2.0           | 6.6  | 10.4 | 16.0 |
| <b>SEDUCE (159)</b>           | 2014 | DCB                               | 9   | 9.1   | 0.28  | 0.16         | 2.13         | 26.4        | 12 |      | 4.2           | 0    | 4.2  | 8.3  |
|                               |      | DES-E                             |     | 0.0   | 0.07  | 0.08         | 2.54*        | 11.4*       |    |      | 4             | 4    | 8    | 16.0 |
| <b>RIBS IV (160)</b>          | 2015 | DCB                               | 9   | 19    |       | 0.30         | <b>1.80</b>  | 30          | 12 | 18   | 1.9           | 3.0  | 13.0 | 16.2 |
|                               |      | DES-E                             |     | 11    |       | 0.18         | <b>2.03*</b> | 23*         |    | 10*  | 2.6           | 1.3  | 4.5* | 8.4* |
| <b>PATENT-C (81)</b>          | 2015 | Standard Scoring Balloon          | 6   | 40.7  |       | <b>0.48</b>  | 1.39         | 46.8        | 6  | 32.1 | Cardiac Death | TVMI | 32.1 | -    |
|                               |      | Paclitaxel Coated Scoring Balloon |     | 7.4*  |       | <b>0.17*</b> | 1.80*        | 33.7*       |    | 6.1* | Cardiac Death | TVMI | 3.0* | -    |
| <b>TIS (161)</b>              | 2016 | DCB                               | 12  | 8.7   |       | <b>0.09*</b> | 2.09         | 26.2        | 12 | 10.3 | Cardiac Death | 1.5  | -    | 7.4  |
|                               |      | DES-E                             |     | 19.1* |       | <b>0.44</b>  | 2.07         | 30.9        |    | 19.1 | Cardiac Death | 1.5  | -    | 16.2 |
| <b>RESTENT- ISR (162)</b>     | 2016 | DES-E                             | 9   |       | 0.40  |              | 2.54         | 16.7        | 36 | 10.1 | 0.6           | 1.9  | 14.5 |      |
|                               |      | DES-Z                             |     |       | 0.45  |              | 2.53         | 17.4        |    | 9.6  | 2.1           | 2.7  | 21.2 |      |
| <b>ISAR-DESIRE 4 (80)</b>     | 2017 | Scoring Balloon pre DCB           | 6-8 | 18.5* |       | 0.31         | 1.95         | <b>35*</b>  | 12 | 18.4 | 1.6           | 3.2  | 16.2 | -    |
|                               |      | Standard Treatment pre DCB        |     | 32.0  |       | 0.41         | 1.77*        | <b>40.4</b> |    | 23.3 | 1.7           | 1.6  | 21.8 | -    |
| <b>DARE (163)</b>             | 2017 | DCB                               | 6   | 18.1  |       | 0.17*        | <b>1.71</b>  | 36.1        | 12 | 10.9 | 0.7           | 2.2  | -    | 8.8  |
|                               |      | DES-E                             |     | 20.9  |       | 0.45         | <b>1.74</b>  | 33.8        |    | 9.2  | 1.4           | 2.8  | -    | 7.1  |
|                               | 2017 | DCB                               | 9   | 19.5  | 0.20  | <b>0.15</b>  | 1.8*         | 34          | 12 | 7.0  | 0.0           | 1.2  | 5.8  | 5.8  |

|                               |      |                          |    |      |              |              |      |       |    |      |               |      |      |       |
|-------------------------------|------|--------------------------|----|------|--------------|--------------|------|-------|----|------|---------------|------|------|-------|
| <b>RESTORE (164)</b>          |      | DES-E                    |    | 5.6  | 0.27         | <b>0.19</b>  | 2.09 | 26    |    | 4.7  | 0.0           | 3.5  | 1.2  | 1.2   |
| <b>BIOLUX-RCT (165)</b>       | 2018 | DCB                      | 6  |      | <b>0.03</b>  | -0.02        | 2.2. | 28.5  | 18 | 17.9 | Cardiac Death | TVMI | -    | 13.5  |
|                               |      | DES                      |    |      | <b>0.20</b>  | 0.13         | 2.2  | 23.7* |    | 18.6 | Cardiac Death | TVMI | -    | 11.6  |
| <b>RESTORE ISR CHINA (67)</b> | 2018 | RESTORE DCB              | 9  | 24.6 | 0.48         | <b>0.39</b>  | 1.64 | 38.9  | 12 | 13.3 | 0.0           | 2.5  | 13.3 | 23.3  |
|                               |      | SEQUENT PLEASE DCB       |    | 18.8 | 0.42         | <b>0.35</b>  | 1.71 | 34.5  |    | 12.6 | 0.0           | 3.4  | 11.8 | 12.6* |
| <b>Ali et al. (79)</b>        | 2019 | PACLITAXEL DCB           | 6  | -    | 0.37         | <b>0.31</b>  | 1.99 | 19.9  | 12 | 16   | 0.0           | -    | 16   | -     |
|                               |      | SIROLIMUS DCB            |    | -    | 0.26         | <b>0.18</b>  | 1.99 | 17.8  |    | 12   | 0.0           | -    | 12   | -     |
| <b>ELEGANT (91)</b>           | 2019 | NON-SLIP BALLOON PRE DCB | 8  | 12.9 | -            | <b>0.28</b>  | 1.82 | 30.4  | 8  | 7.0  | 1.0           | 0.0  | 6.0  | 7.0   |
|                               |      | HPNCB PRE DCB            |    | 15.2 | -            | <b>0.27</b>  | 1.71 | 33.1  |    | 9.7  | 3.9           | 1.9  | 7.8  | 9.7   |
| <b>Sato et al. (102)</b>      | 2019 | ELCA + DCB               | 12 | 20   | -            | <b>-0.25</b> | -    | -     | 12 | -    | -             | -    | 10.0 | -     |
|                               |      | DCB                      |    | 20   | -            | <b>-0.33</b> | -    | -     |    | -    | -             | -    | 20.0 | -     |
| <b>AGENT ISR (68)</b>         | 2019 | Agent DCB                | 6  | 13.7 | <b>0.397</b> |              | 1.62 | 20.7  | 12 |      | 3.1           | 4.6  | 7.7  | 9.2   |
|                               |      | SeQuent DCB              |    | 22.4 | <b>0.393</b> |              | 1.51 | 20.2  |    |      | 1.7           | 3.3  | 10.0 | 11.7  |

### **Supplementary Table 1 and Supplementary Table 2 Legend**

Details of the literature search are given in the Methods. The primary endpoint of each trial is highlighted in bold. \* =p value <0.05.

ARTIST: Angioplasty Versus Rotational Atherectomy for Treatment of Diffuse In-Stent Restenosis Trial; AGENT ISR: Comparison of Agent™ and SeQuent® Please Paclitaxel Coated Balloon Catheters in Coronary In-stent Restenosis; BA: balloon angioplasty; IVBT: intravascular brachytherapy; BIOLUX: Clinical Performance of the Pantera LUX Paclitaxel Releasing Balloon Versus the Drug Eluting Orsiro Hybrid Stent System in Patients With In-stent Restenosis; CB: cutting balloon; CRISTAL: A Prospective, Randomised, Multi-Center Comparison of the CYPHER Select™ Sirolimus-Eluting Stent and Balloon Re-Angioplasty for Treatment of Patients With Intra-Des Restenosis; DARE: Drug Eluting bAlloon for In-stent REstenosis. Multi-center, Randomised Trial to Study the Effect of the SeQuent Please Drug-eluting Balloon Versus the XIENCE Prime Drug-eluting Stent for the Treatment of In-stent Restenosis; DCB: drug-coated balloon; DES: drug-eluting stent(s); DES-E: everolimus drug eluting stent(s); DES-P: paclitaxel drug-eluting stent(s); DES-S: sirolimus drug-eluting stent(s); DM: diabetes mellitus; E-DES-d: everolimus-eluting stent for diffuse restenosis; ELEGANT: Effect of Combination of Non-sLip Element Balloon (NSE) and druG-coated bAlloon (DCB) for In-steNT Restenosis Lesions; INDEED: Treatment of diffuse IN-stent restenosis with Drug-Eluting stents vs. intracoronary bEta-raDiation therapy; ISAR-DESIRE: Intracoronary Stenting or Angioplasty for Restenosis Reduction: Drug-Eluting Stents for In-Stent Restenosis; ISAR-DESIRE 2: Intracoronary Stenting and Angiographic Results: Drug Eluting Stents for In-Stent Restenosis 2); ISAR-DESIRE 3: Intracoronary Stenting and Angiographic Results: Drug Eluting Stents for In-Stent Restenosis 3; ISTLL: in-stent late loss; ISGLL: in-segment late loss; LL: lesion length; Long WRIST: Washington Radiation for In-Stent Restenosis Trial for Long Lesions; MACE: major adverse cardiac events (including death or cardiac death, myocardial infarction [MI], and target lesion revascularisation [TLR] or target vessel revascularisation [TVR] as considered in each trial for the combined outcome measure); MLD: minimal lumen diameter; OSIRIS: Oral Sirolimus to Inhibit Recurrent In-stent Stenosis; PACCOCATH-ISR: Treatment of in-Stent Restenosis by Paclitaxel Coated PTCA Balloons; PATENT-C: Treatment of Coronary In-stent Restenosis by a Paclitaxel Coated

AngioSculpt Scoring Balloon; PCI: percutaneous coronary intervention (BA, rotational atherectomy [RA], excimer coronary laser atherectomy [ECLA] , BMS); PEPCAD: The Paclitaxel-Eluting PTCA-Balloon Catheter to Treat Small Vessel Coronary Artery Disease. A Pilot Study; PEPCAD II: The Paclitaxel-Eluting PTCA-Balloon Catheter in Coronary Artery Disease to Treat In-Stent Restenoses: A Comparison to the Paclitaxel-Eluting Taxus™ Stent. A Pilot Study; PEPCAD-CHINA: A Multicenter, Randomized, Active Controlled Clinical Study to Evaluate the Safety and Efficacy of the Treatment of In-stent Restenosis Lesion by Paclitaxel-eluting PTCA- Balloon Catheter Versus Paclitaxel-eluting Stent; PEPCAD DES: Treatment of DES-In-Stent Restenosis With SeQuent® Please Paclitaxel Eluting PTCA Catheter; RA: rotational atherectomy; RE: binary restenosis; RESCUT: Restenosis Cutting Balloon Evaluation Trial; RESTENT ISR: Prospective, Single-blinded, Randomized Comparison of the Clinical and Angiographic Results With Intravascular Analysis of Everolimus-Eluting Versus Zotarolimus-Eluting stents for In-Stent Restenosis(ISR) Lesions: Volumetric Analysis With Intravascular Ultrasound (IVUS): Phase IV Multicenter Trial; RESTORE: Treatment of Drug-Eluting Stent REstenosis Using Drug-Eluting STents vs. Drug-COated Balloon for Preventing REcurrent In-Stent Restenosis; RESTORE CHINA: Compare the Efficacy and Safety of RESTORE DEB and SeQuent Please in Chinese Patient With Coronary In-stent Restenosis; RIBS I: Restenosis Intra-stent Balloon Angioplasty Versus Elective Stenting; RIBS II: Restenosis Intra-stent: Balloon Angioplasty Versus Elective Sirolimus-Eluting Stenting; RIBS V: Restenosis Intra-stent: Drug-eluting Balloon vs. Everolimus-eluting Stent; ROSTER: Randomized Trial of Rotational Atherectomy Versus Balloon Angioplasty for Diffuse In-Stent Restenosis; RVD: reference vessel diameter; S-DES-d: sirolimus-eluting stent for diffuse restenosis; SEDUCE: Safety and Efficacy of a Drug eluting balloon in Coronary artery rEstenosis; SIR: usual dose oral sirolimus; SIRhd: high-dose oral sirolimus; SISR: Sirolimus-Eluting Stent vs. Brachytherapy in Patients With Bare Metal In-Stent Restenosis; TAXUS V ISR: A Prospective, Randomized Trial Evaluating Slow-Release Formulation TAXUS Paclitaxel-Eluting Coronary Stent in the Treatment of In-Stent Restenosis; TIS: Treatment of Coronary In-Stent Restenosis; WRIST: Washington Radiation for In-Stent restenosis Trial
